# Supplementary material for: Non-Newtonian viscous shear thinning in ionic liquids
Source: Royal Society of Chemistry journal article supplement (doi:10.1039/b916049n), 2010-01-01
Supplement: b916049n.pdf [file b916049n.pdf]

# Non-Newtonian viscous shear thinning in ionic liquids

## Supplementary data

Geoffrey L. Burrell\*   Noel F. Dunlop†   Frances Separovic‡

January 15, 2010

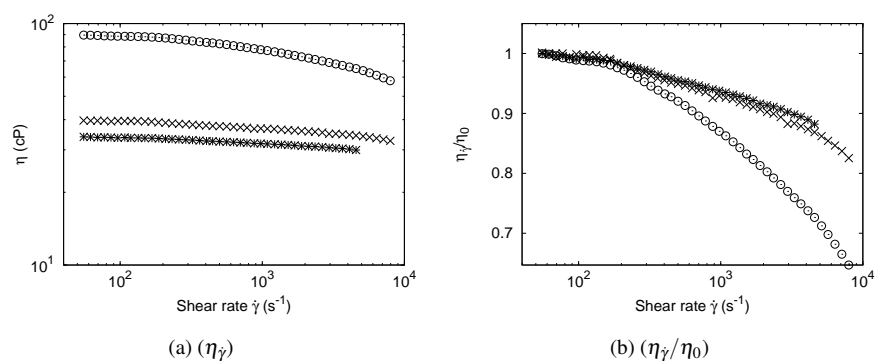

Figure 1: BMIm.Cl shear viscosity ( $\eta_{\dot{\gamma}}$ ) at increasing temperature (a) as a function of shear rate  $\dot{\gamma}$  ( $\text{s}^{-1}$ ) and, (b) normalised with respect to zero shear viscosity ( $\eta_0$ ). Higher temperature demonstrates shift of shear thinning onset to higher frequency as a function of temperature. 348 K ( $\odot$ ), 358 K ( $+$ ), 368 K ( $\times$ ).

\*School of Chemistry, The University of Melbourne, Melbourne, Australia

†Orica Ltd, Melbourne, Australia

‡School of Chemistry, The University of Melbourne, Melbourne, Australia, E-mail: fs@unimelb.edu.au

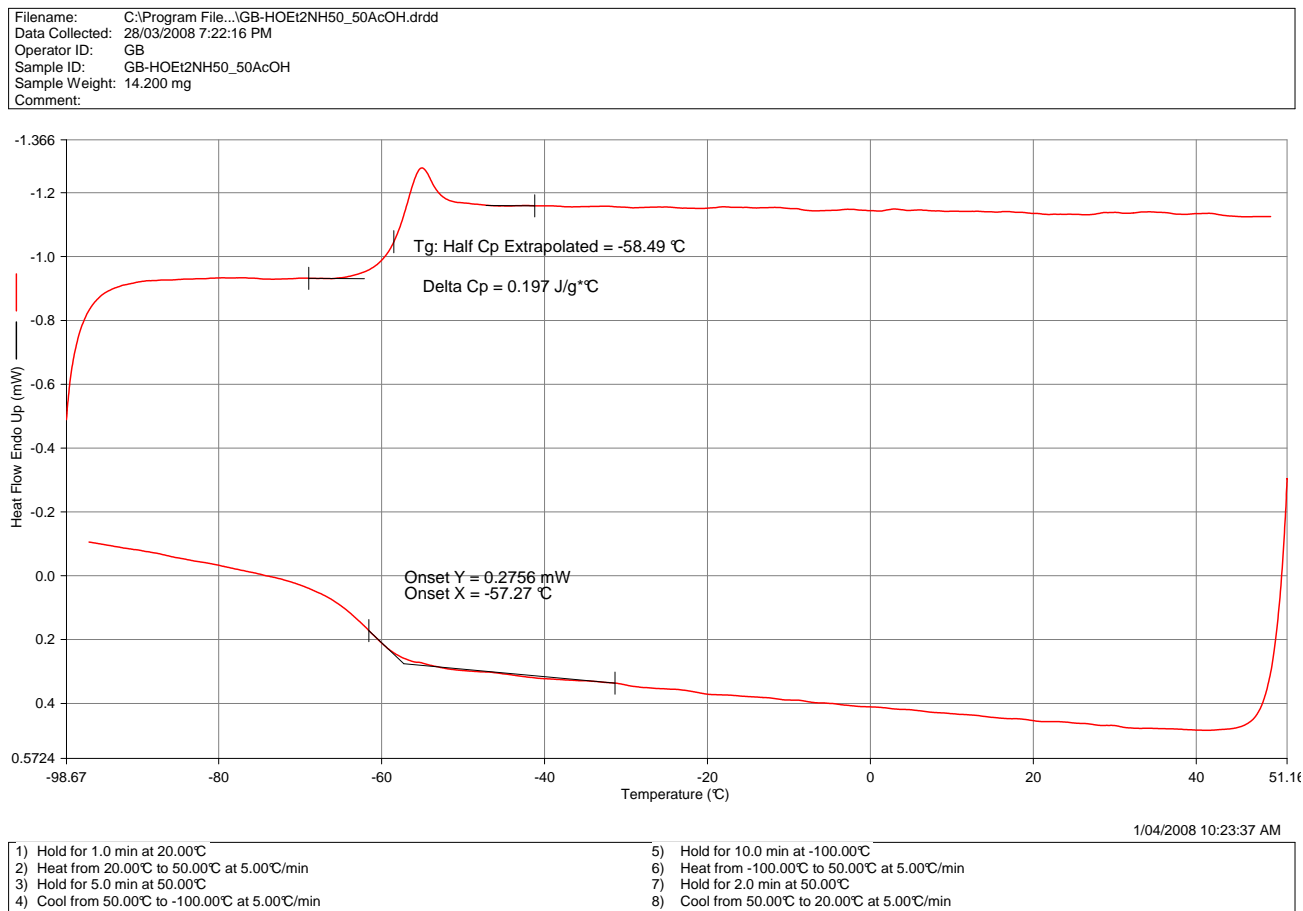

Figure 2: Diferential scanning calorimetry scan of (HOEt)<sub>2</sub>NH.AcOH.
